# Supplementary material
Source: MDPI journal article supplement (https://www.mdpi.com/2073-4433/12/12/1561)
Supplement: s1 [file s1]

| Station             | Sigla | Departamento | Provincia   | Distrito                | Temporal Resolution | Data Period                   | Altitude (masl) | Decimal Latitude | Decimal Longitude | Supervised by |
|---------------------|-------|--------------|-------------|-------------------------|---------------------|-------------------------------|-----------------|------------------|-------------------|---------------|
| Alamor              | ALA   | Piura        | Piura       | Lancones                | One Hour            | 01/04/2019<br>–<br>30/04/2021 | 116             | -4.4774889       | -80.3978944       | SENAMHI       |
| Alto de Poclus      | APO   | Piura        | Ayabaca     | Frías                   | One day             | 01/04/2019<br>–<br>30/04/2021 | 3080            | -4.9169028       | -79.8904722       | SENAMHI       |
| Ayabaca             | AYA   | Piura        | Ayabaca     | Ayabaca                 | One Hour            | 01/04/2019<br>–<br>30/04/2021 | 2648            | -4.6377556       | -79.7107667       | SENAMHI       |
| Bernal              | BER   | Piura        | Sechura     | Bernal                  | One day             | 01/04/2019<br>–<br>30/04/2021 | 11              | -5.4544944       | -80.7426222       | SENAMHI       |
| Bocatoma Chipillico | BCH   | Piura        | Piura       | Las Lomas               | One Hour            | 01/04/2019<br>–<br>30/04/2021 | 340             | -4.7142028       | -80.1182472       | SENAMHI       |
| Canchaque           | CAN   | Piura        | Huancabamba | San Miguel de El Faique | One Hour            | 01/04/2019<br>–<br>30/04/2021 | 1279            | -5.4005472       | -79.6051972       | SENAMHI       |
| Cerro de Arena      | CAR   | Lambayeque   | Lambayeque  | Los Olmos               | One day             | 01/04/2019<br>–<br>29/02/2020 | 59              | -5.9246056       | -80.204625        | SENAMHI       |

| Station           | Sigla | Departamento | Provincia  | Distrito   | Temporal Resolution | Data Period                   | Altitude (masl) | Decimal Latitude | Decimal Longitude | Supervised by |
|-------------------|-------|--------------|------------|------------|---------------------|-------------------------------|-----------------|------------------|-------------------|---------------|
| Chalaco MET CP    | CHP   | Piura        | Morropón   | Chalaco    | One day             | 01/04/2019<br>–<br>30/04/2021 | 2290            | -5.0386528       | -79.7916833       | SENAMHI       |
| Chalaco MET EMA   | CHA   | Piura        | Morropón   | Chalaco    | One hour            | 01/04/2019<br>–<br>30/04/2021 | 2290            | -5.0386278       | -79.7916861       | SENAMHI       |
| Chulucanas        | CHU   | Piura        | Morropón   | Chulucanas | One hour            | 01/04/2019<br>–<br>30/04/2021 | 89              | -5.1084444       | -80.1695389       | SENAMHI       |
| Chusis            | CHS   | Piura        | Sechura    | Sechura    | One day             | 01/04/2019<br>–<br>30/04/2021 | 8               | -5.5275639       | -80.81275         | SENAMHI       |
| El Alto           | EAL   | Piura        | Talara     | El Alto    | One day             | 01/04/2019<br>–<br>30/04/2021 | 295             | -4.2619806       | -81.2181528       | SENAMHI       |
| El Virrey MET EMA | EVA   | Lambayeque   | Lambayeque | Los Olmos  | One hour            | 01/04/2019<br>–<br>31/03/2021 | 211             | -5.5357833       | -79.9841472       | SENAMHI       |
| El Virrey MET PLU | EVP   | Piura        | Morropón   | La Matanza | One day             | 01/04/2019<br>–<br>30/04/2021 | 208             | -5.5337028       | -79.9823278       | SENAMHI       |

| Station          | Sigla | Departamento | Provincia   | Distrito           | Temporal Resolution | Data Period                   | Altitude (masl) | Decimal Latitude | Decimal Longitude | Supervised by |
|------------------|-------|--------------|-------------|--------------------|---------------------|-------------------------------|-----------------|------------------|-------------------|---------------|
| Hacienda Barrios | HBA   | Piura        | Morropón    | San Juan de Bigote | One hour            | 01/04/2019<br>–<br>30/04/2021 | 303             | -5.2894972       | -79.6990861       | SENAMHI       |
| Hacienda Bigote  | HAB   | Piura        | Morropón    | Salitral           | One hour            | 01/04/2019<br>–<br>31/03/2021 | 205             | -5.3208889       | -79.7856861       | SENAMHI       |
| Hacienda Shumaya | HSH   | Piura        | Huancabamba | Sóndor             | One hour            | 01/04/2019<br>–<br>31/03/2021 | 1991            | -5.3668083       | -79.3605583       | SENAMHI       |
| Hualcuy          | HUY   | Piura        | Ayabaca     | Ayabaca            | One hour            | 01/04/2019<br>–<br>30/04/2021 | 1988            | -4.7470056       | -79.6072917       | SENAMHI       |
| Huancabamba      | HBB   | Piura        | Huancabamba | Huancabamba        | One Hour            | 01/04/2019<br>–<br>30/04/2021 | 1959            | -5.2468056       | -79.4539917       | SENAMHI       |
| Huarmaca MET CO  | HMC   | Piura        | Huancabamba | Huarmaca           | One day             | 01/04/2019<br>–<br>30/04/2021 | 2232            | -5.5647889       | -79.5197528       | SENAMHI       |
| Huarmaca MET EMA | HMA   | Piura        | Huancabamba | Huarmaca           | One Hour            | 01/04/2019<br>–<br>30/04/2021 | 2171            | -5.5658611       | -79.5254444       | SENAMHI       |

| Station      | Sigla | Departamento | Provincia | Distrito    | Temporal Resolution | Data Period                   | Altitude (masl) | Decimal Latitude | Decimal Longitude | Supervised by |
|--------------|-------|--------------|-----------|-------------|---------------------|-------------------------------|-----------------|------------------|-------------------|---------------|
| La Ardilla   | LAR   | Piura        | Sullana   | Lancones    | One hour            | 01/04/2019<br>–<br>30/04/2021 | 134             | -4.4909361       | -80.3881889       | SENAMHI       |
| La Esperanza | LES   | Piura        | Paita     | Colán       | One day             | 01/04/2019<br>–<br>30/04/2021 | 7               | -4.9211361       | -81.0596917       | SENAMHI       |
| Lancones     | LAN   | Piura        | Sullana   | Lancones    | One hour            | 01/04/2019<br>–<br>30/04/2021 | 136             | -4.6428972       | -80.5471611       | SENAMHI       |
| Malacasi     | MLA   | Piura        | Morropón  | Salitral    | One hour            | 01/04/2019<br>–<br>30/04/2021 | 153             | -5.339775        | -79.8579417       | SENAMHI       |
| Mallares     | MLL   | Piura        | Sullana   | Marcavelica | One day             | 01/04/2019<br>–<br>30/04/2021 | 44              | -4.8557417       | -80.7355556       | SENAMHI       |
| Miraflores   | MIR   | Piura        | Piura     | Castilla    | One day             | 01/04/2019<br>–<br>31/03/2020 | 34              | -5.1752778       | -80.6165417       | SENAMHI       |
| Morropón     | MRR   | Piura        | Morropón  | Morropón    | One hour            | 01/04/2019<br>–<br>30/04/2021 | 128             | -5.1946444       | -79.971075        | SENAMHI       |

| Station                | Sigla | Departamento | Provincia   | Distrito              | Temporal Resolution | Data Period                   | Altitude (masl) | Decimal Latitude | Decimal Longitude | Supervised by |
|------------------------|-------|--------------|-------------|-----------------------|---------------------|-------------------------------|-----------------|------------------|-------------------|---------------|
| Paimas                 | PMS   | Piura        | Ayabaca     | Paimas                | One hour            | 01/04/2019<br>–<br>30/04/2021 | 603             | -4.6343861       | -79.9458417       | SENAMHI       |
| Pananga                | PNA   | Piura        | Sullana     | Marcavelica           | One day             | 01/04/2019<br>–<br>30/04/2021 | 360             | -4.5155639       | -80.7394444       | SENAMHI       |
| Partidor               | PAR   | Piura        | Piura       | Las Lomas             | One day             | 01/04/2019<br>–<br>30/04/2021 | 218             | -4.7319694       | -80.2798222       | SENAMHI       |
| Puente Ñacara          | PNC   | Piura        | Morropón    | Chulucanas            | One hour            | 01/04/2019<br>–<br>30/04/2021 | 91              | -5.1128056       | -80.1729611       | SENAMHI       |
| Puente Simón Rodríguez | PSR   | Piura        | Paíta       | Amotape               | One hour            | 01/04/2019<br>–<br>30/04/2021 | 12              | -4.8799917       | -81.0203833       | SENAMHI       |
| Salala                 | SLL   | Piura        | Huancabamba | Carmen de la Frontera | One day             | 01/04/2019<br>–<br>30/04/2021 | 2974            | -5.1115278       | -79.4634889       | SENAMHI       |
| Salitral               | SAL   | Piura        | Morropón    | Salitral              | One hour            | 01/04/2019<br>–<br>30/04/2021 | 156             | -5.3460167       | -79.8376111       | SENAMHI       |

| Station           | Sigla | Departamento | Provincia   | Distrito      | Temporal Resolution | Data Period                   | Altitude (masl) | Decimal Latitude | Decimal Longitude | Supervised by |
|-------------------|-------|--------------|-------------|---------------|---------------------|-------------------------------|-----------------|------------------|-------------------|---------------|
| San Miguel        | SMG   | Piura        | Piura       | Catacaos      | One day             | 01/04/2019<br>–<br>30/04/2021 | 24              | -5.2462028       | -80.6843583       | SENAMHI       |
| San Pedro         | SPD   | Piura        | Morropón    | Morropón      | One hour            | 01/04/2019<br>–<br>30/04/2021 | 240             | -5.0795389       | -80.0161972       | SENAMHI       |
| Santo Domingo     | SDM   | Piura        | Morropón    | Santo Domingo | One day             | 01/04/2019<br>–<br>30/04/2021 | 1490            | -5.03825         | -79.8704861       | SENAMHI       |
| Sapillica MET EMA | SMA   | Piura        | Ayabaca     | Sapillica     | One hour            | 14/06/2019<br>–<br>28/02/2021 | 1406            | -4.7963889       | -79.9997222       | SENAMHI       |
| Sapillica MET PLU | SMIP  | Piura        | Ayabaca     | Sapillica     | One day             | 01/05/2019<br>–<br>23/04/2021 | 1451            | -4.7781694       | -79.9817806       | SENAMHI       |
| Sausal de Culucan | SDC   | Piura        | Ayabaca     | Ayabaca       | One day             | 01/04/2019<br>–<br>30/04/2021 | 997             | -4.752375        | -79.7579222       | SENAMHI       |
| Sondorillo        | SMC   | Piura        | Huancabamba | Sondorillo    | One day             | 02/04/2019<br>–<br>30/04/2021 | 1917            | -5.3397944       | -79.4313694       | SENAMHI       |

| Station           | Sigla | Departamento | Provincia   | Distrito    | Temporal Resolution | Data Period                   | Altitude (masl) | Decimal Latitude | Decimal Longitude | Supervised by |
|-------------------|-------|--------------|-------------|-------------|---------------------|-------------------------------|-----------------|------------------|-------------------|---------------|
| Tambogrande       | TAM   | Piura        | Piura       | Tambogrande | One hour            | 01/04/2019<br>–<br>30/04/2021 | 60              | -4.9384806       | -80.3470306       | SENAMHI       |
| Tuluce            | TUL   | Piura        | Huancabamba | Sóndor      | One day             | 01/04/2019<br>–<br>31/03/2021 | 2209            | -5.477175        | -79.3474194       | SENAMHI       |
| Chavez            | CHV   | Piura        | Chulucanas  | Chulucanas  | 10 minutes          | 01/04/2019<br>–<br>31/12/2019 | 175             | -5.1364722       | -80.3053056       | UDEP          |
| Colán – Udep      | COU   | Piura        | Paita       | Colán       | 10 minutes          | 01/04/2019<br>–<br>30/04/2021 | 65              | -5.0237444       | -81.0539778       | UDEP          |
| NRG – BAYOVAR     | NRB   | Piura        | Sechura     | Bayovar     | 10 minutes          | 01/04/2019<br>–<br>31/12/2019 | 150             | -5.7987361       | -81.0660333       | UDEP          |
| NRG – HUANCABAMBA | NRH   | Piura        | Huancabamba | Huancabamba | 10 minutes          | 01/04/2019<br>–<br>31/12/2019 | 2005            | -5.2484778       | -79.4545306       | UDEP          |
| NRG – MORROPON    | NRM   | Piura        | Morropón    | Morropón    | 10 minutes          | 01/04/2019<br>–<br>31/12/2019 | 131             | -5.1895889       | -79.967           | UDEP          |

| Station         | Sigla | Departamento | Provincia   | Distrito         | Temporal Resolution | Data Period                   | Altitude (masl) | Decimal Latitude | Decimal Longitude | Supervised by |
|-----------------|-------|--------------|-------------|------------------|---------------------|-------------------------------|-----------------|------------------|-------------------|---------------|
| NRG NEGRITOS    | NRN   | Piura        | Talara      | Negritos         | 10 minutes          | 01/04/2019<br>–<br>30/04/2021 | 25              | -4.6584861       | -81.3041389       | UDEP          |
| NRG SAN IGNACIO | NSI   | Cajamarca    | San Ignacio | San Ignacio      | 10 minutes          | 01/04/2019<br>–<br>31/12/2019 | 1252            | -5.1502333       | -78.9960167       | UDEP          |
| NRG UDEP        | NRU   | Piura        | Piura       | Piura            | 10 minutes          | 01/04/2019<br>–<br>31/01/2021 | 42              | -5.1706167       | -80.6385667       | UDEP          |
| CERRITOS        | CRR   | Piura        | Sechura     | Cristo Nos Valga | One day             | 28/02/2020<br>–<br>22/03/2021 | 16              | -5.498789        | -80.719069        | UDEP          |
